# Supplementary material for: Pd(OAc)2 and (DHQD)2PHAL as a simple, efficient and recyclable/reusable catalyst system for Suzuki–Miyaura cross-coupling reactions in H2O at room temperature
Source: Royal Society of Chemistry journal article supplement (doi:10.1039/c5nj00288e), 2015-01-01

# **Pd(OAc)<sub>2</sub> and (DHQD)<sub>2</sub>PHAL as simple, efficient and recyclable/reusable catalyst system for Suzuki–Miyaura cross–coupling reactions in H<sub>2</sub>O at room temperature**

Bishwajit Saikia\*<sup>a</sup>, Abdul Aziz Ali<sup>a</sup>, Preeti Rekha Boruah<sup>a</sup>, Diganta Sarma<sup>a</sup> and Nabin Chandra Barua<sup>b</sup>

<sup>a</sup> Department of Chemistry, Dibrugarh University, Dibrugarh–786004, Assam, INDIA.

<sup>b</sup> Natural Products Chemistry Division, CSIR–North East Institute of Science and Technology, Jorhat–785006, Assam, INDIA.

E–mail: bishwajitsaikia@gmail.com (B. Saikia)

## **Supporting Information**

### **Contents**

General procedure for Suzuki–Miyaura reaction.....S1

NMR spectra of the products of the Suzuki–Miyaura reaction.....S2–S27

**General:** Starting materials and solvents were purchased from common commercial sources and were used without additional purification.  $^1\text{H}$  NMR and  $^{13}\text{C}$  NMR spectra were recorded at 500 MHz or 300 MHz using TMS as internal standard. Mass spectroscopy data of the product of Suzuki reaction was collected on a MS-EI instrument. Infrared spectra were obtained from a FTIR spectrometer.

**General experimental procedure for Suzuki–Miyaura cross–coupling reaction:** In a 50 mL round bottomed flask, a mixture of aryl halide (1 mmol), arylboronic acid (1.2 mmol),  $\text{Pd}(\text{OAc})_2$  (0.01 mmol),  $(\text{DHQD})_2\text{PHAL}$  (0.01 mmol) and  $\text{K}_2\text{CO}_3$  (1.2 mmol) in  $\text{H}_2\text{O}$  (3 mL) and the mixture was stirred at room temperature for a time period of 2–3 h. The progress of the reaction was monitored by TLC. After completion of the reaction it was extracted with diethyl ether (3 x 10 mL) and washed with water. The combined ether extract was dried over anhydrous  $\text{Na}_2\text{SO}_4$ . The filtrate was concentrated under reduced pressure. The product was purified by column chromatography over silica gel using hexane/ethyl acetate (9:1 v/v) to get the desired coupling product. The products were characterized by IR and NMR.

Name of Sample: MJK-33

<sup>1</sup>H NMR spectra of

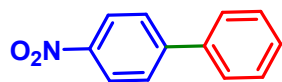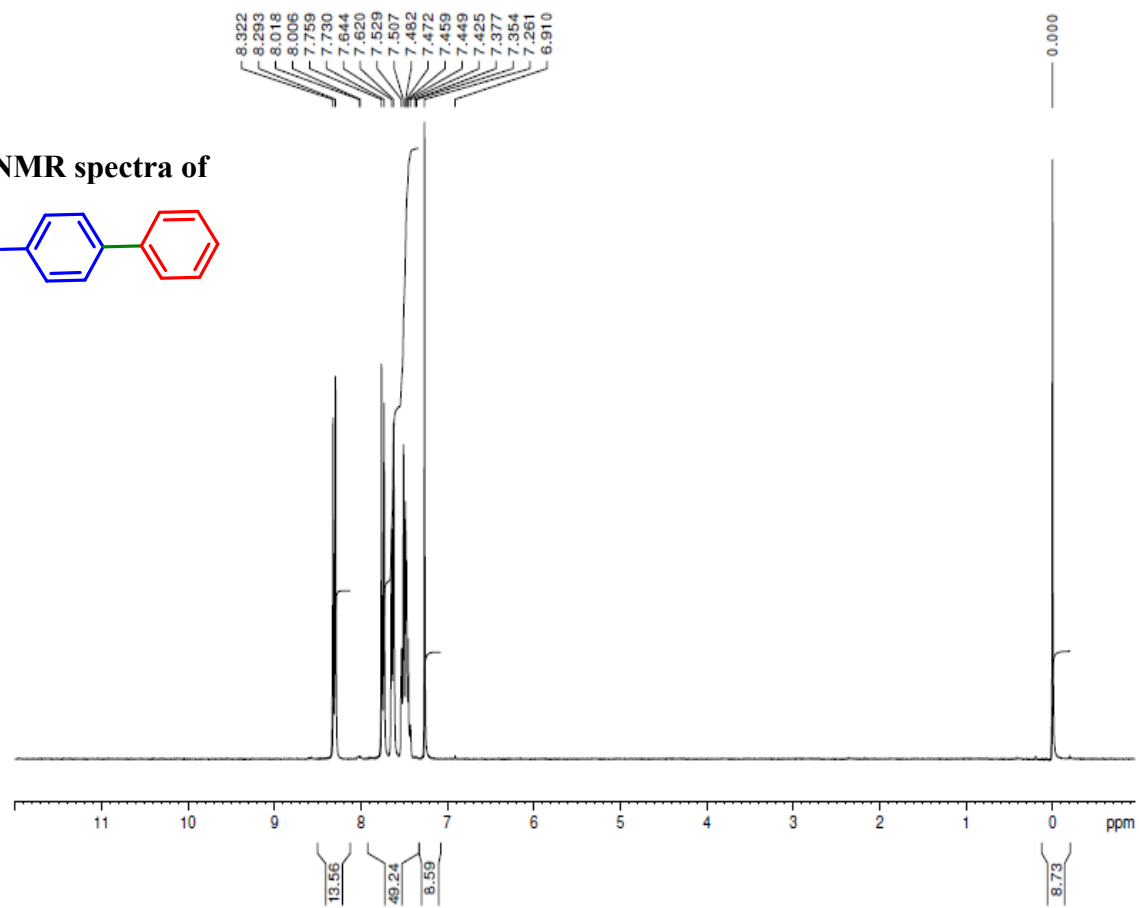

**<sup>13</sup>C NMR spectra of**

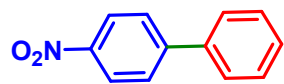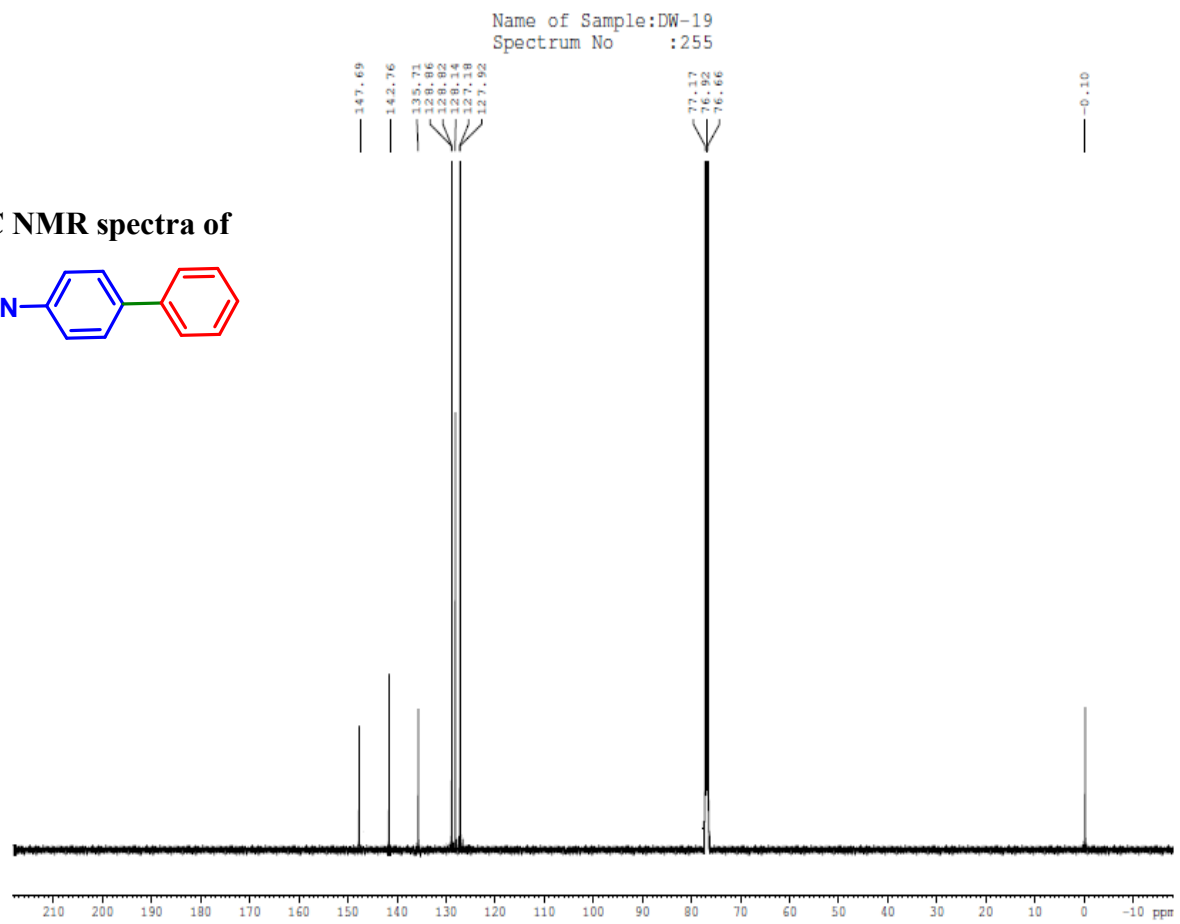

Name of Sample: SJB-2

<sup>1</sup>H NMR spectra of

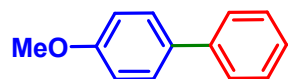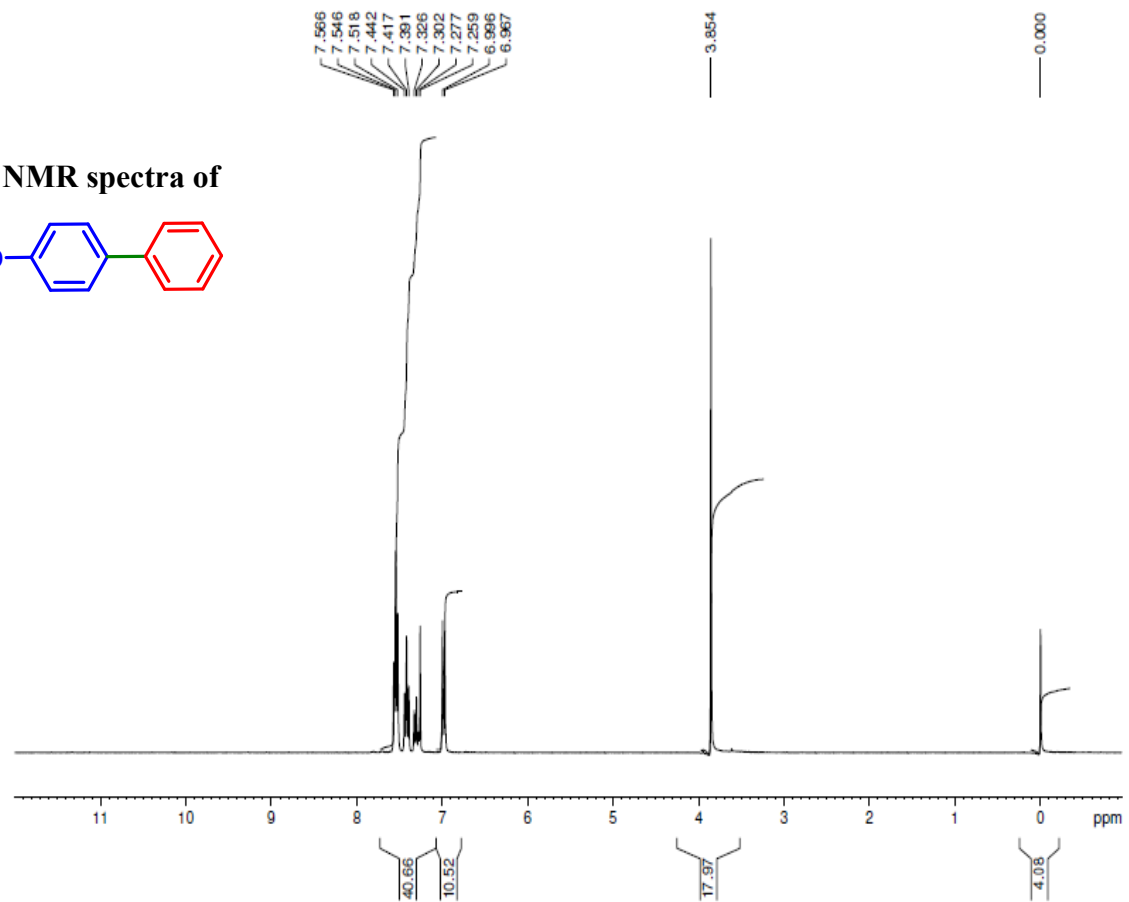

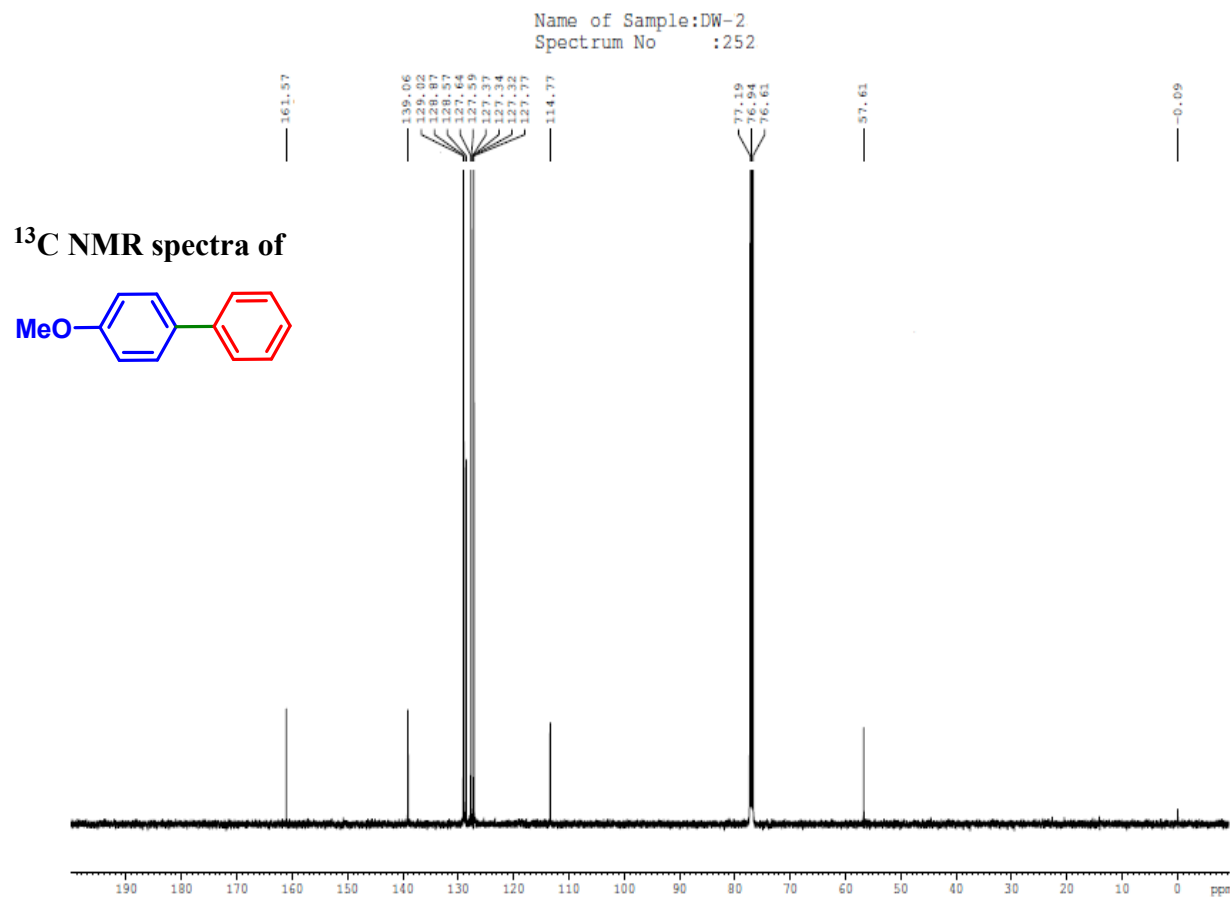

Recorded by: Dr. P. J. Saikia  
Name of Sample: BS  
Spectrum No: 10027

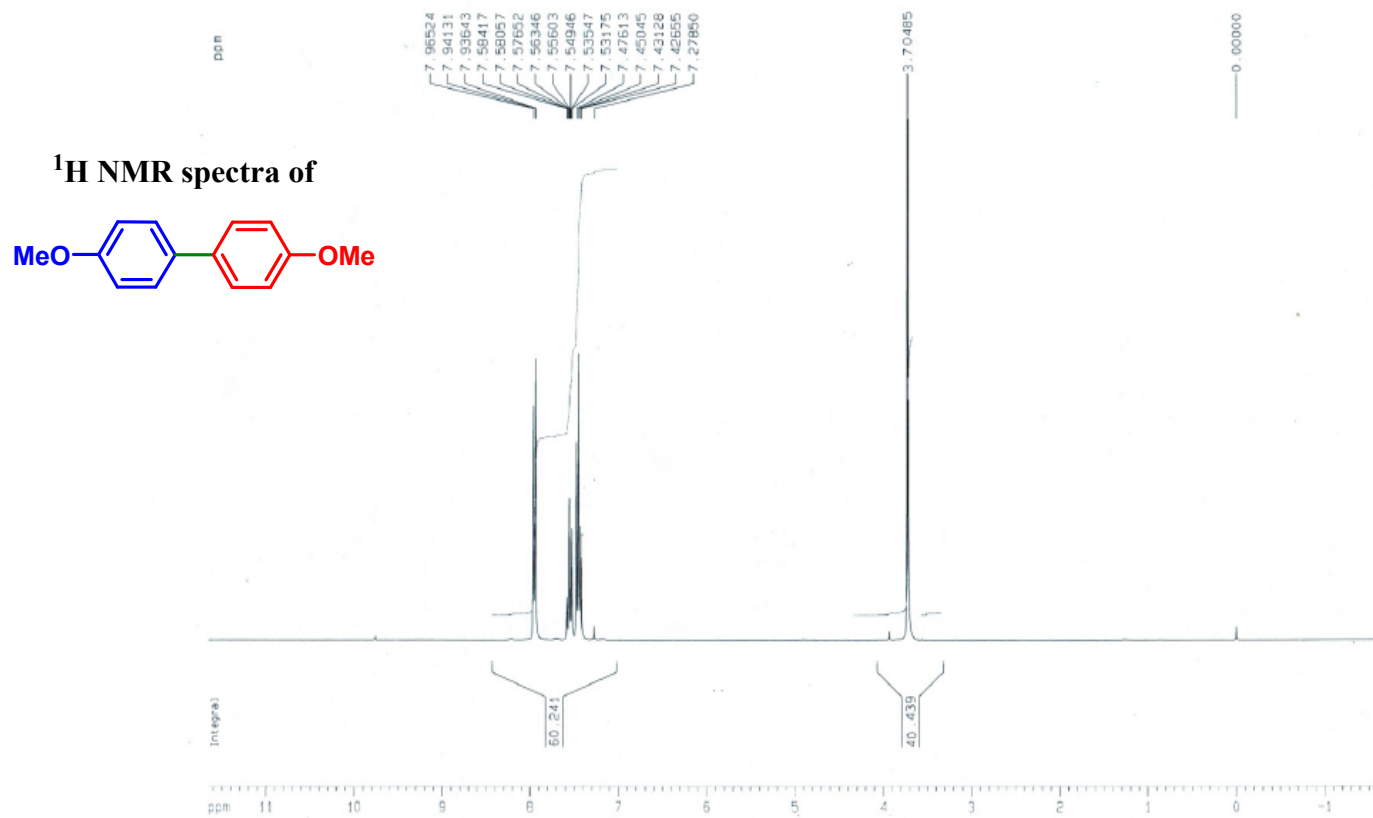

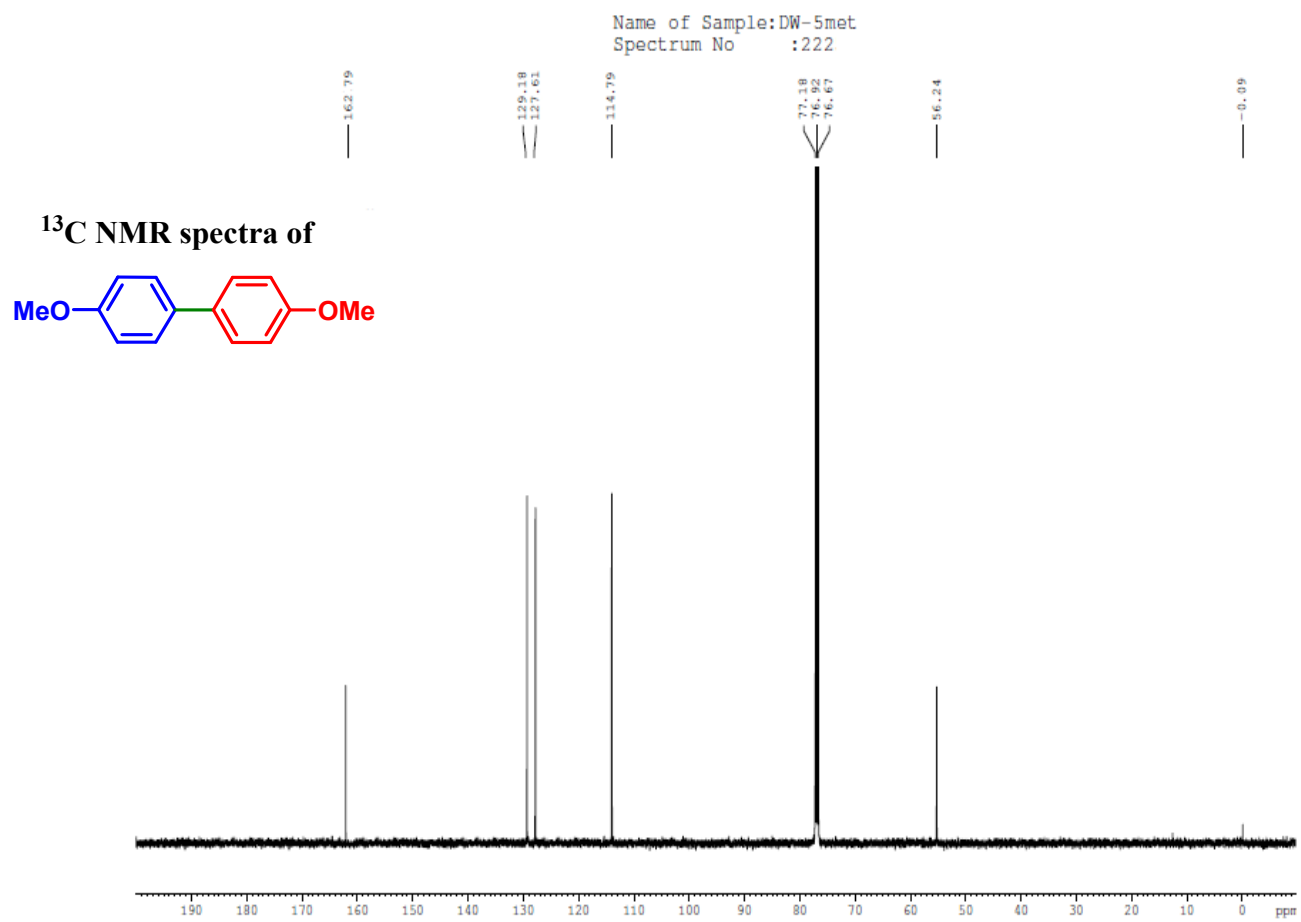



Name of Sample: BS 10  
Spectrum No: 1004B

<sup>1</sup>H NMR spectra of

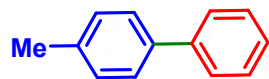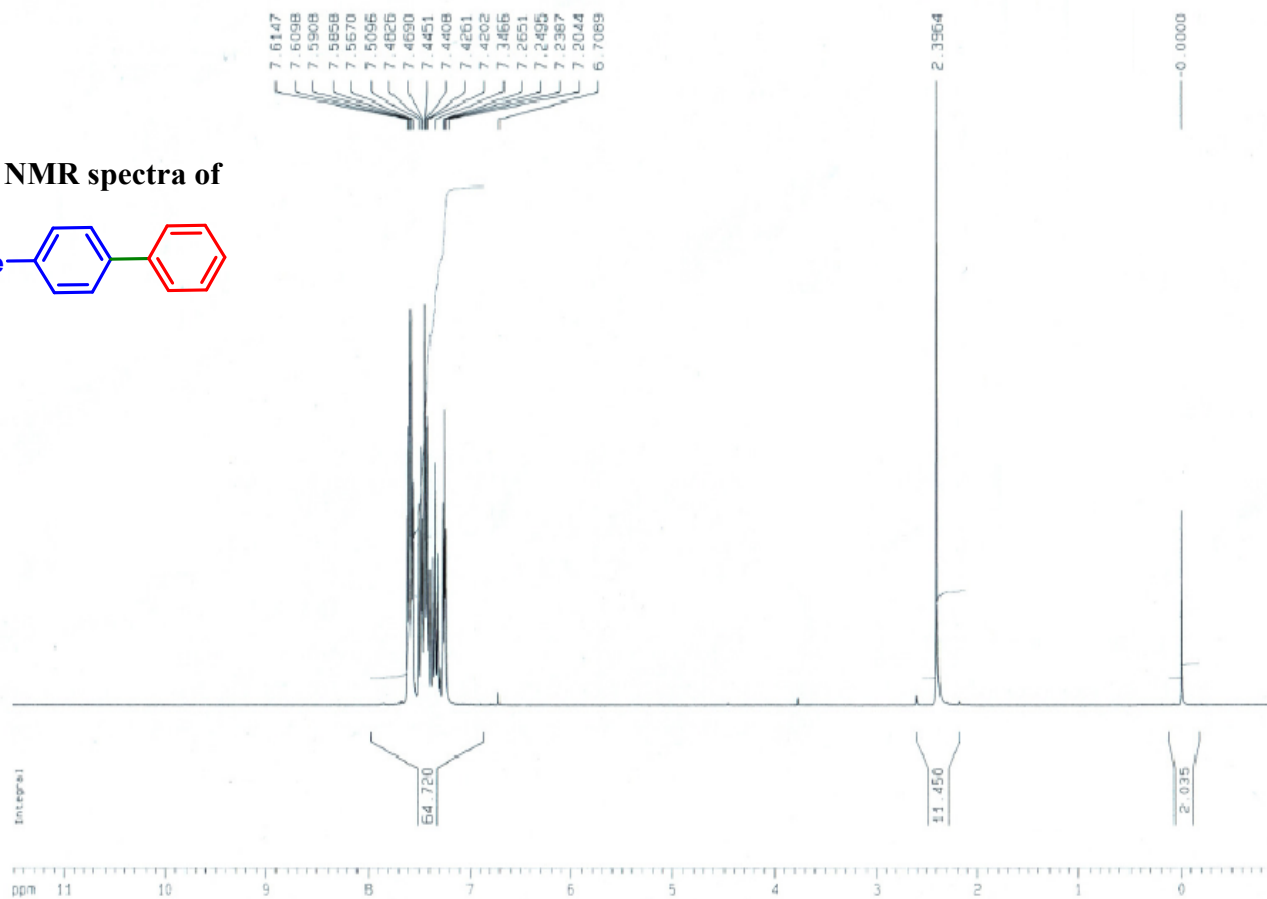

**<sup>13</sup>C NMR spectra of**

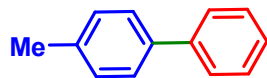

Name of Sample:DW-4m  
Spectrum No :225

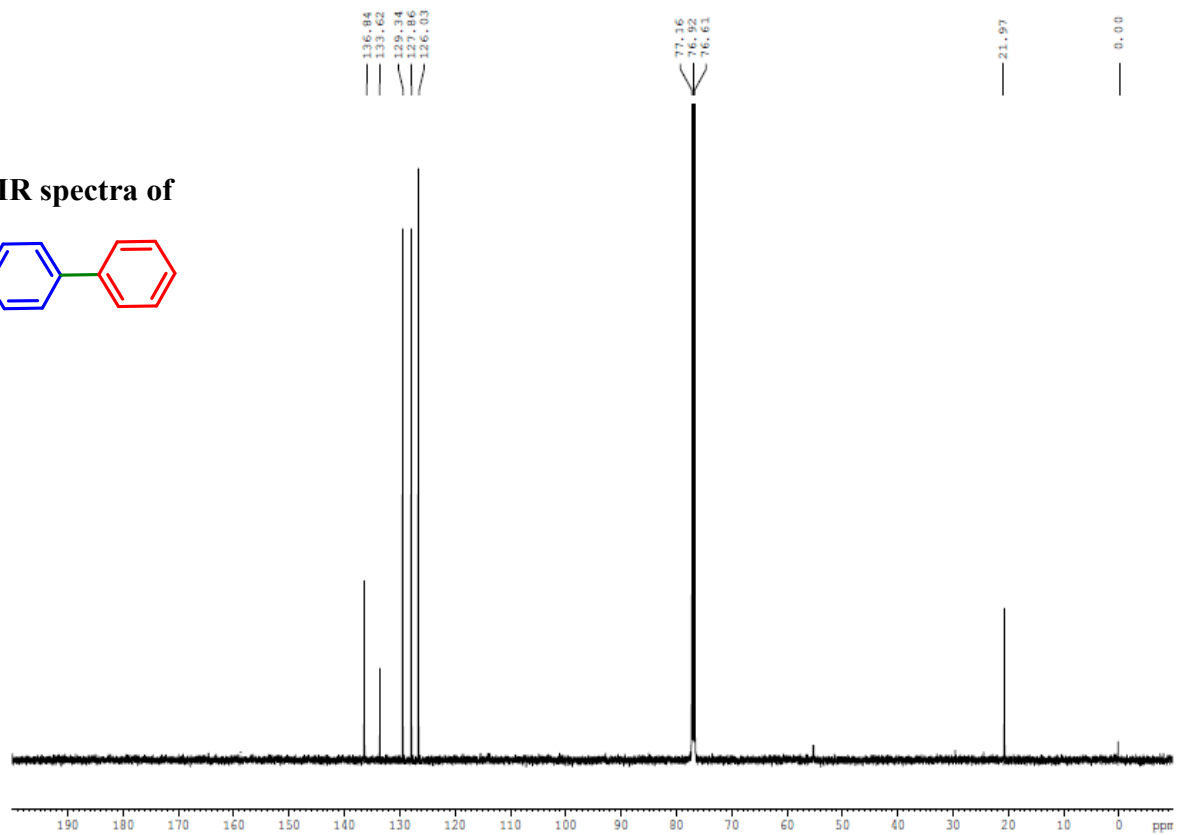

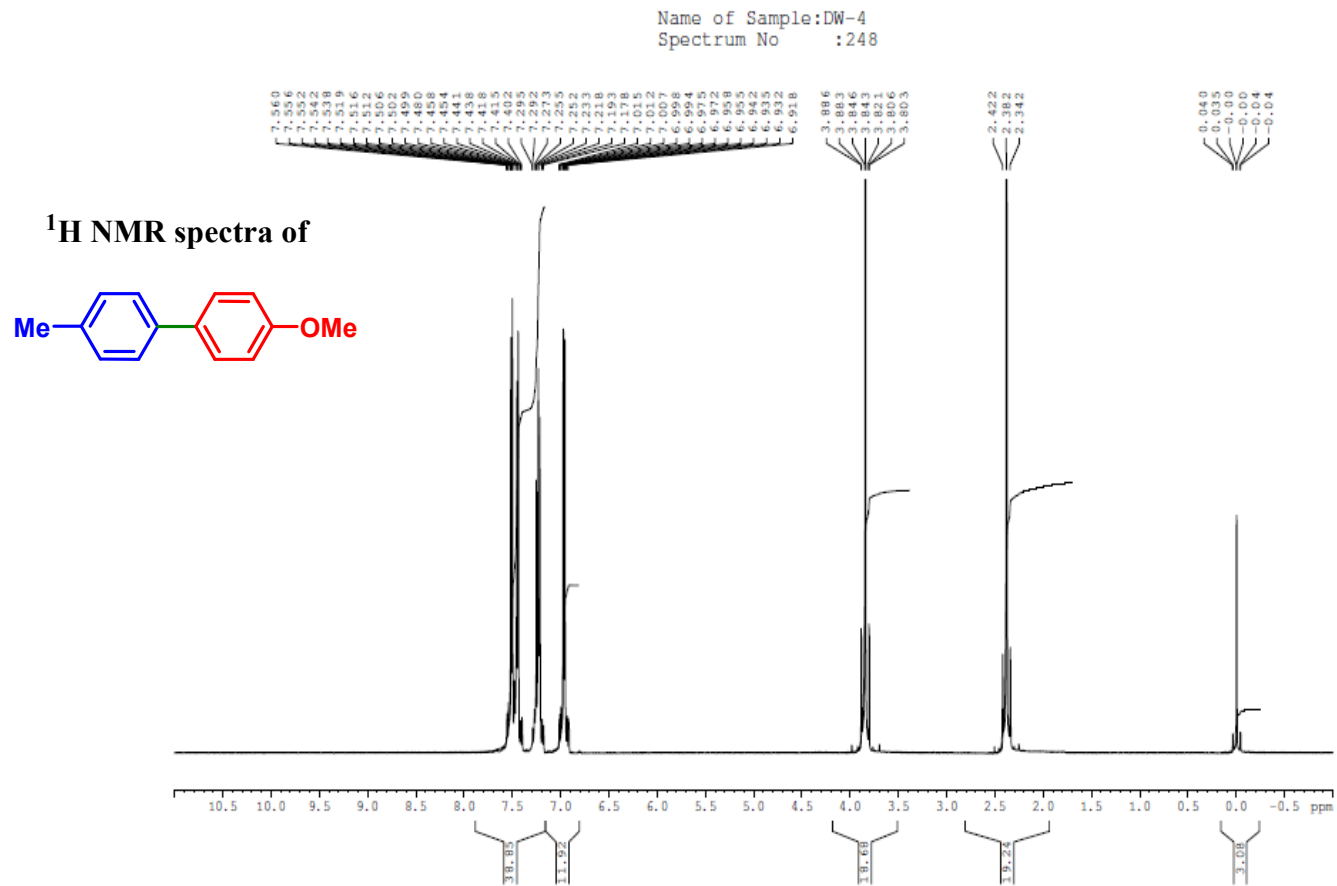

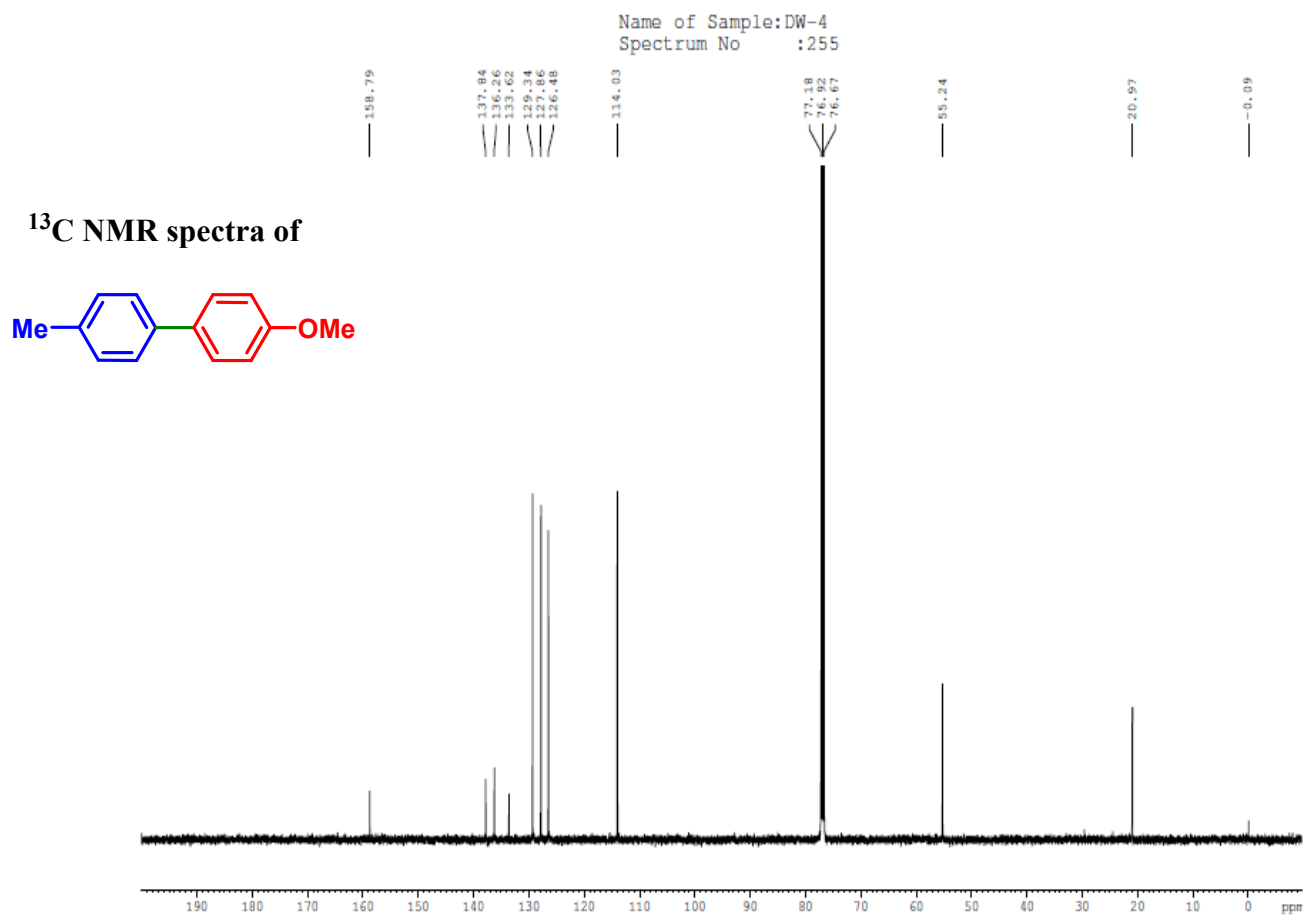

Name of Sample:DW-7  
Spectrum No :249

<sup>1</sup>H NMR spectra of

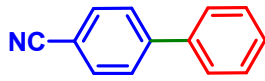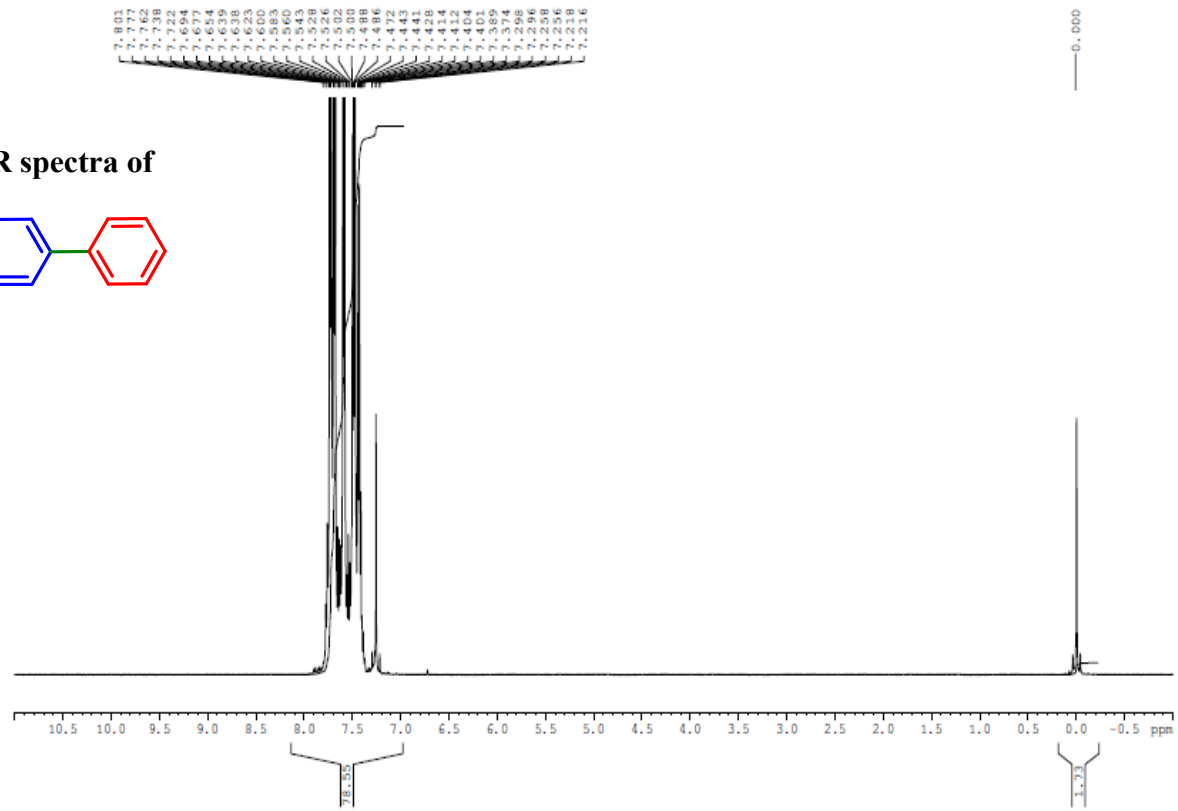

<sup>13</sup>C NMR spectra of

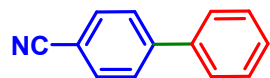

Name of Sample:DW-7  
Spectrum No :256

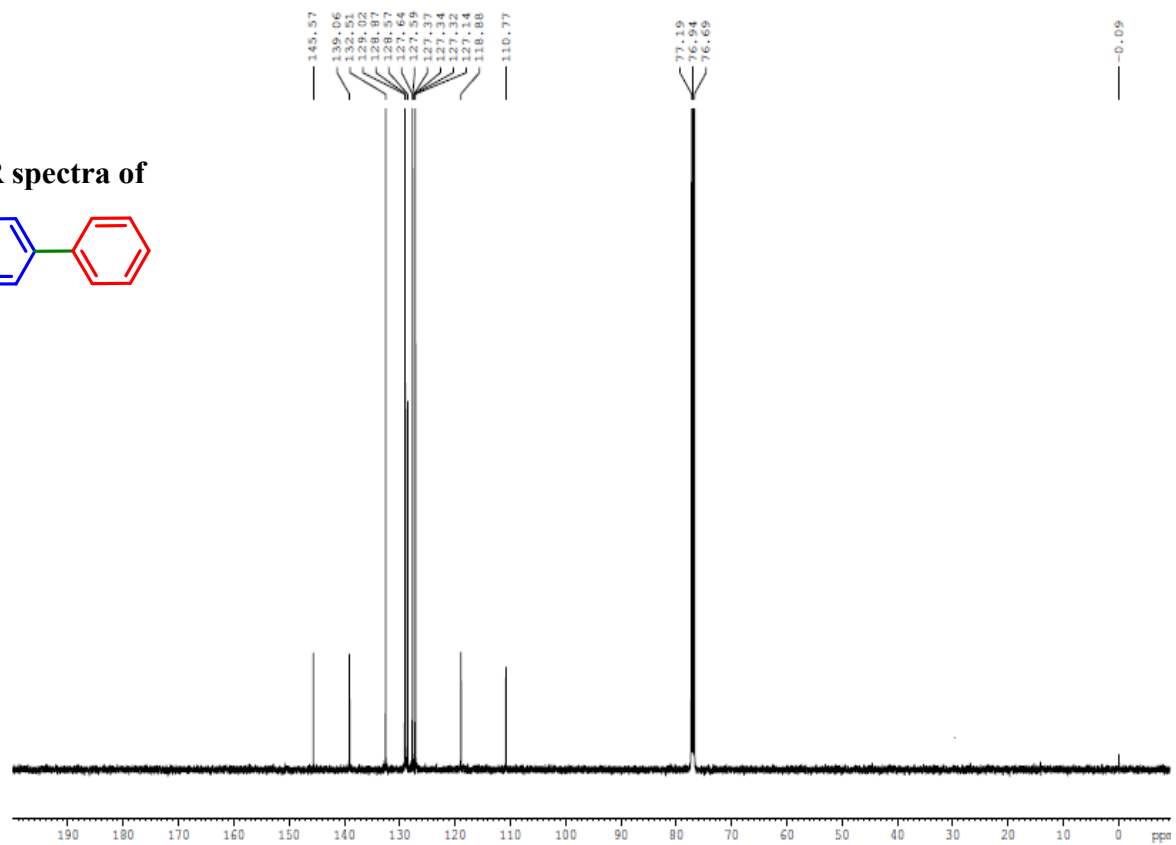

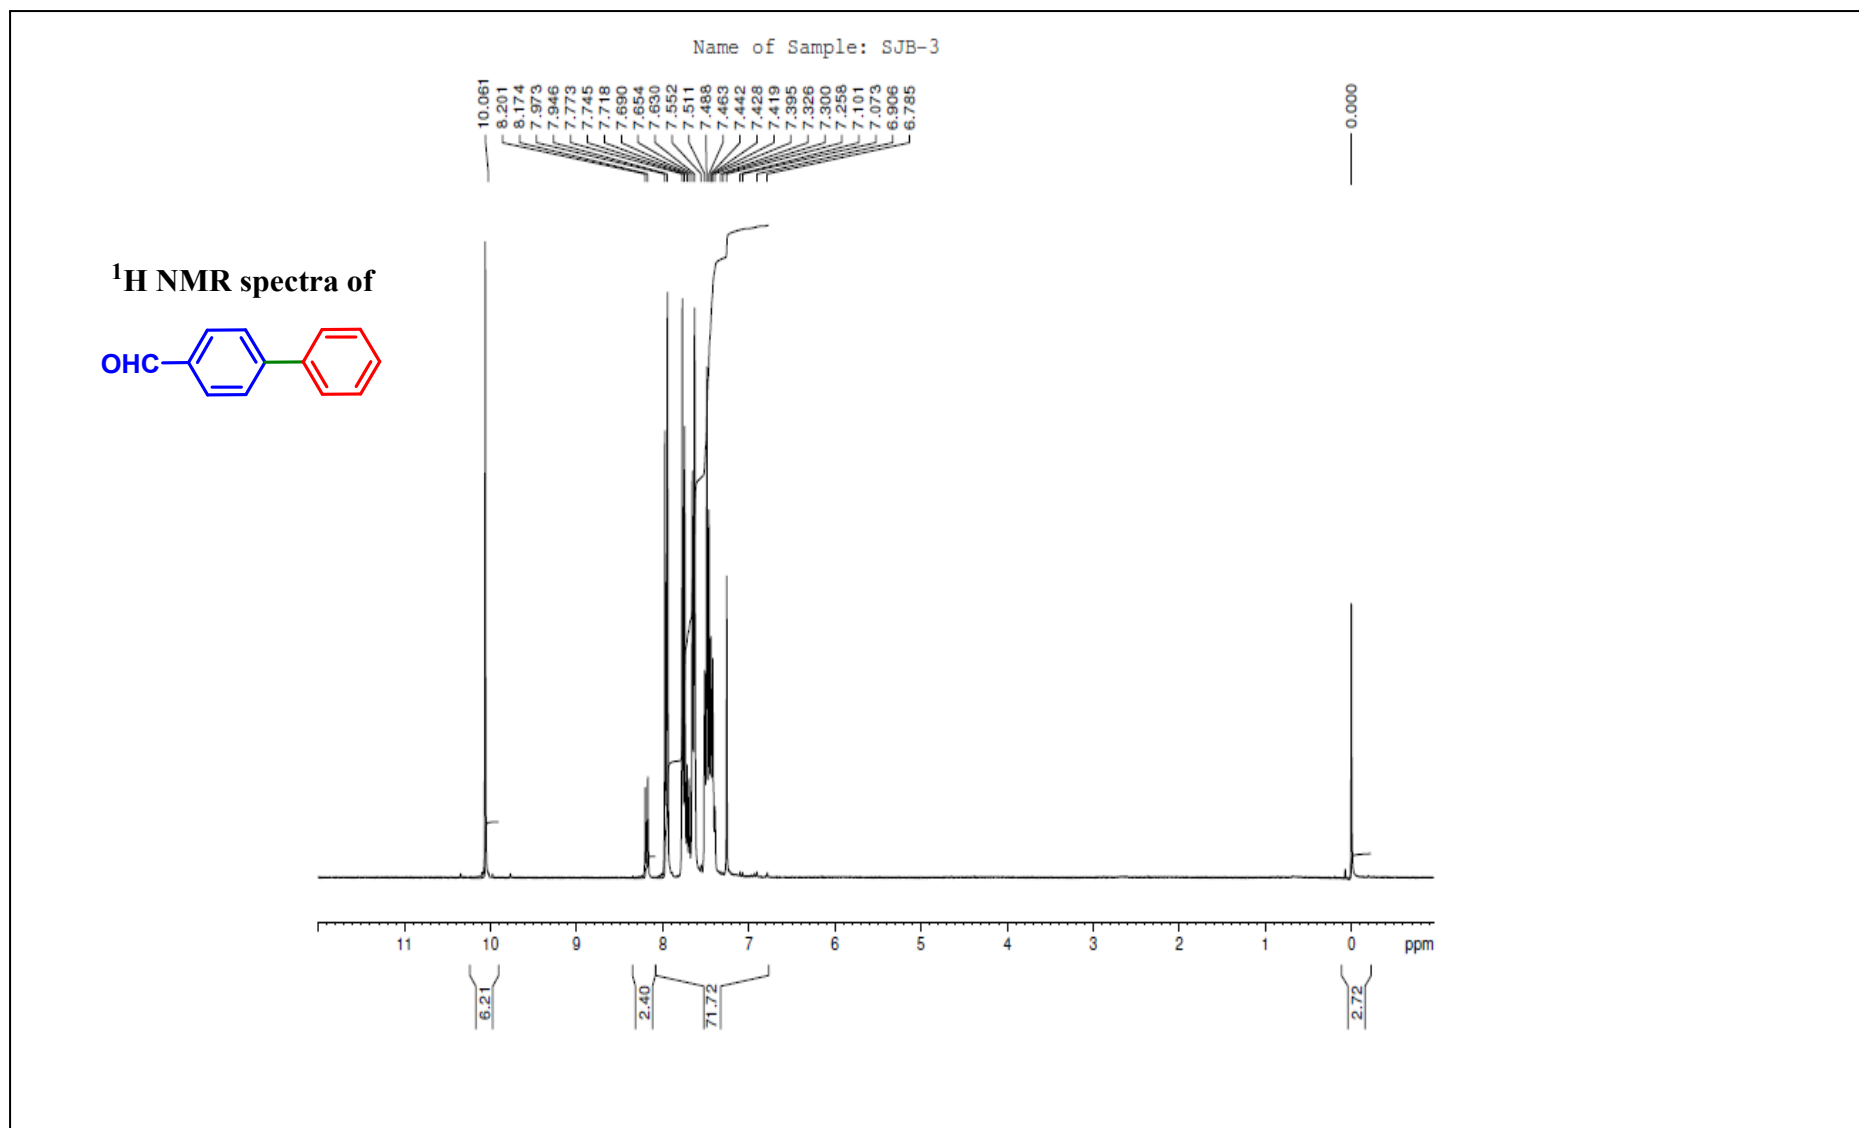

**<sup>13</sup>C NMR spectra of**

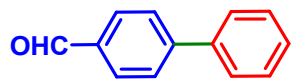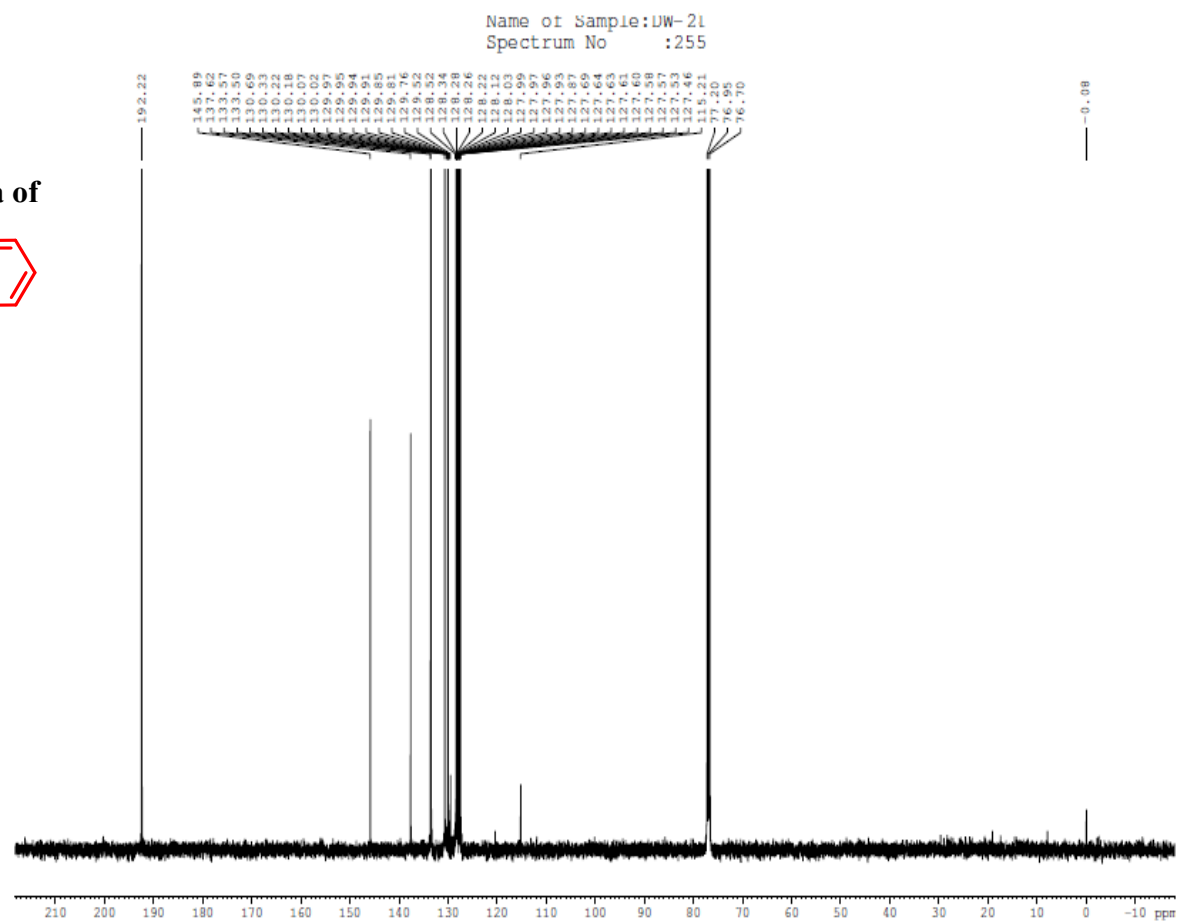



<sup>1</sup>H NMR spectra of

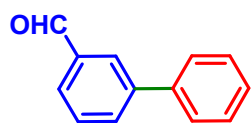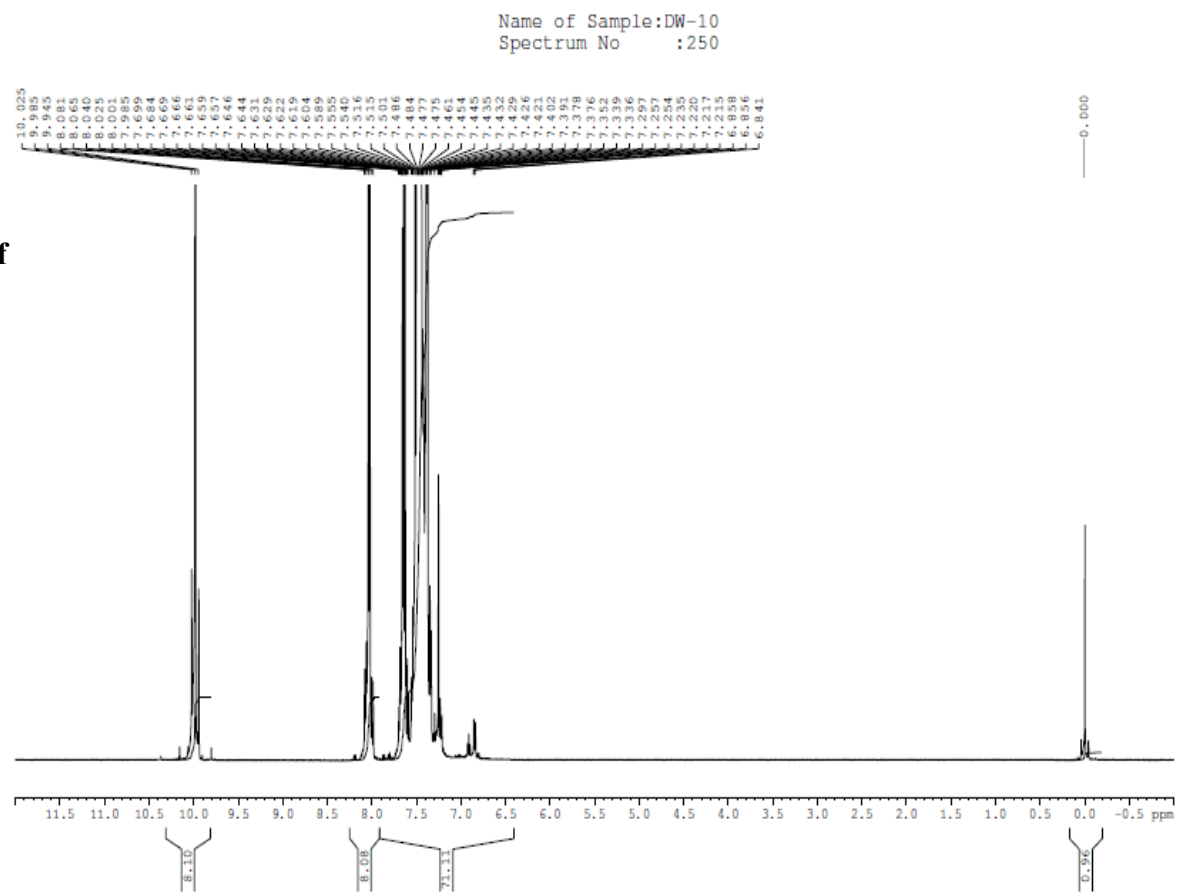

<sup>13</sup>C NMR spectra of

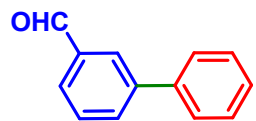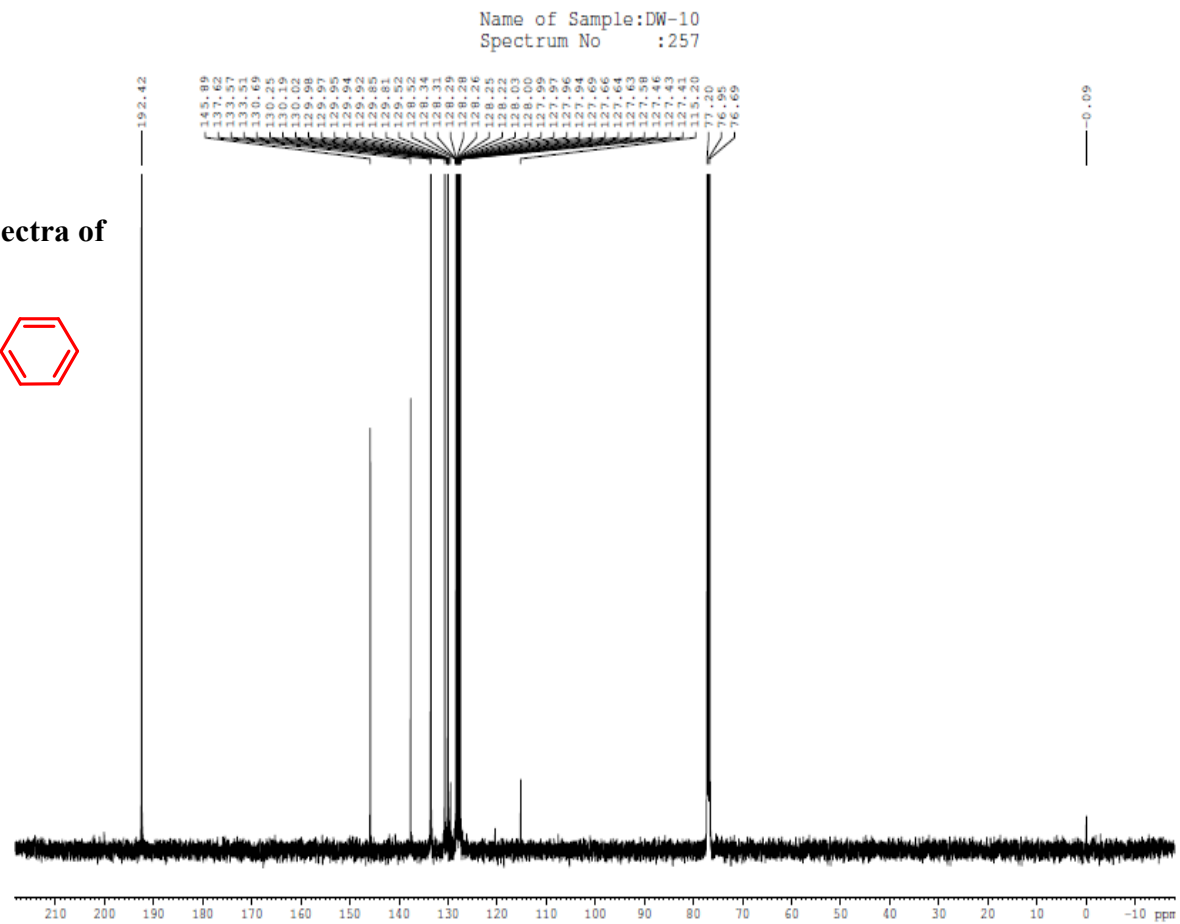

<sup>1</sup>H NMR spectra of

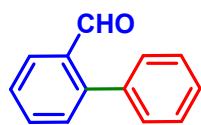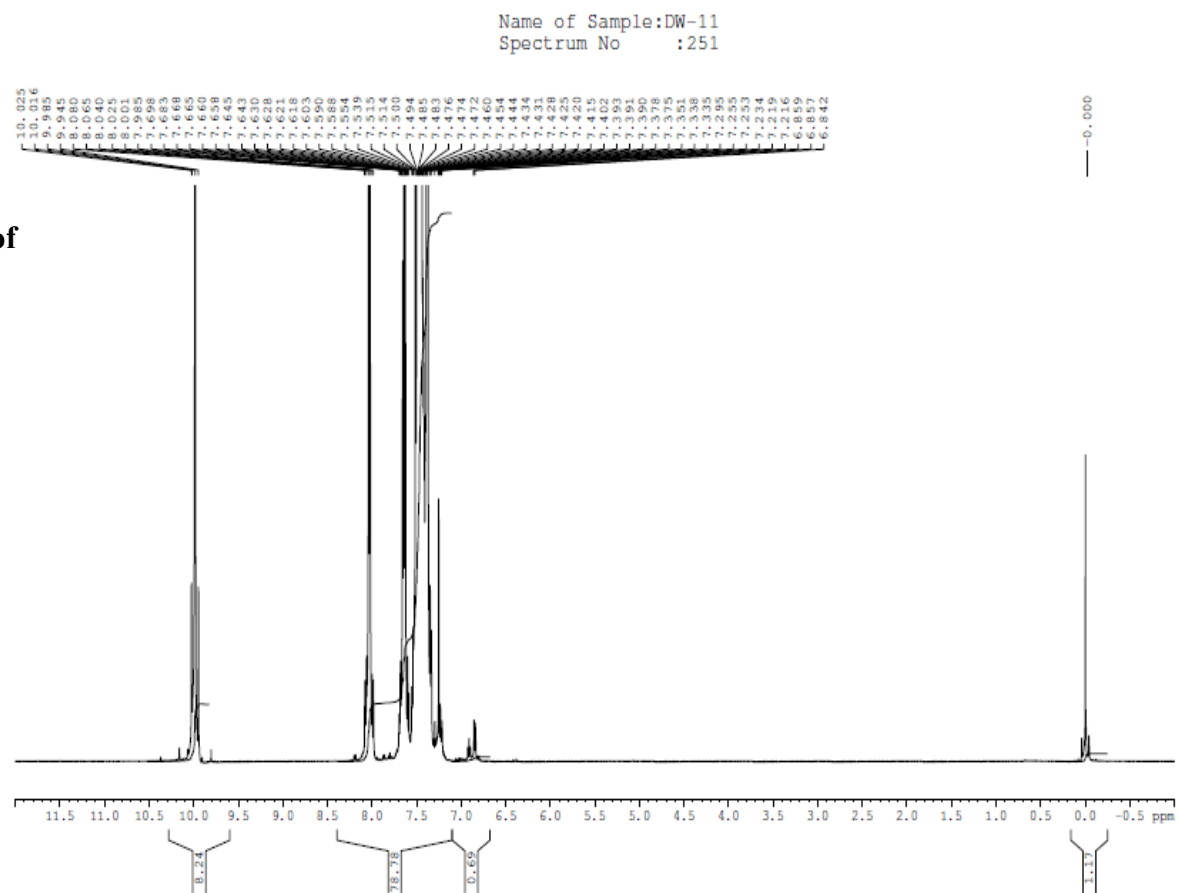

<sup>13</sup>C NMR spectra of

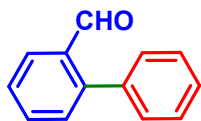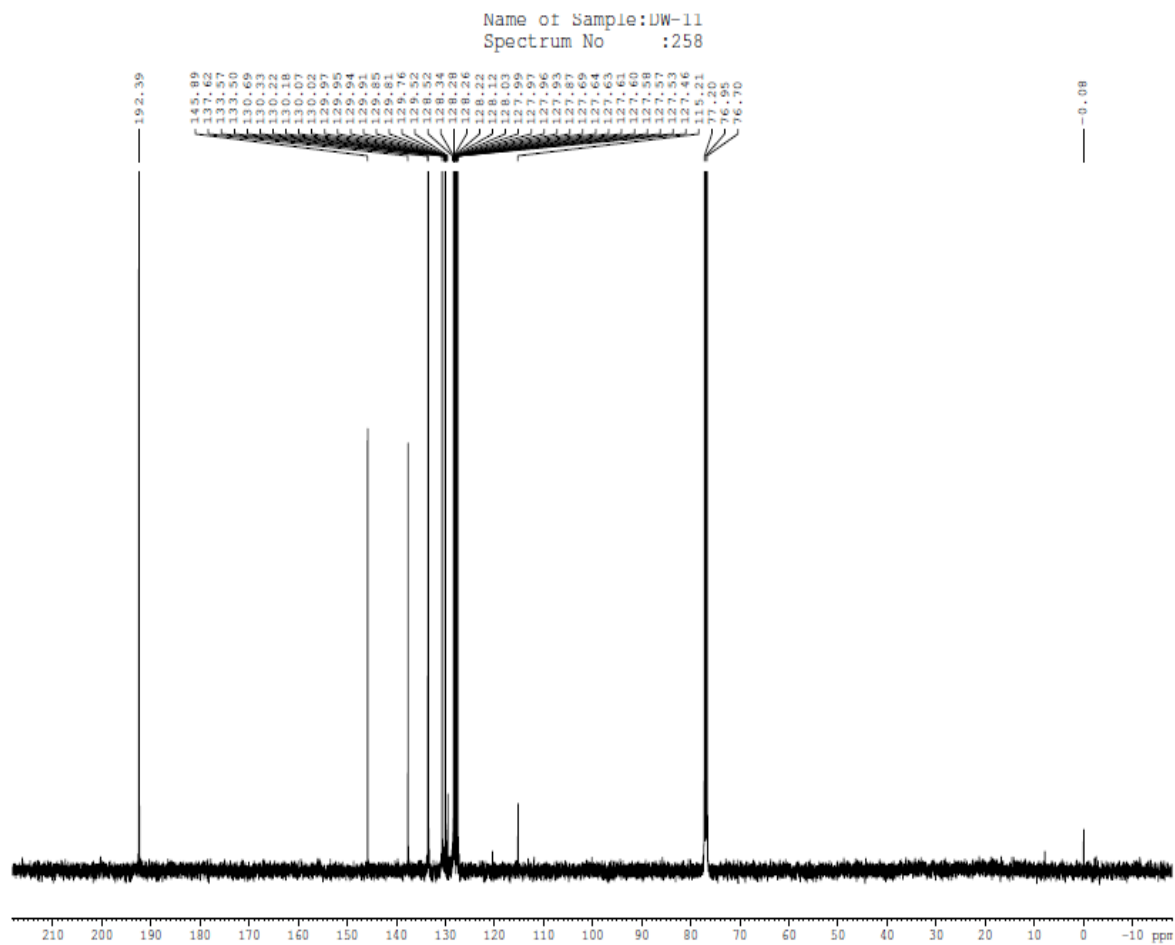

Name of Sample:DW-12  
Spectrum No :252

<sup>1</sup>H NMR spectra of

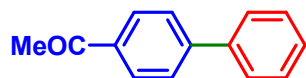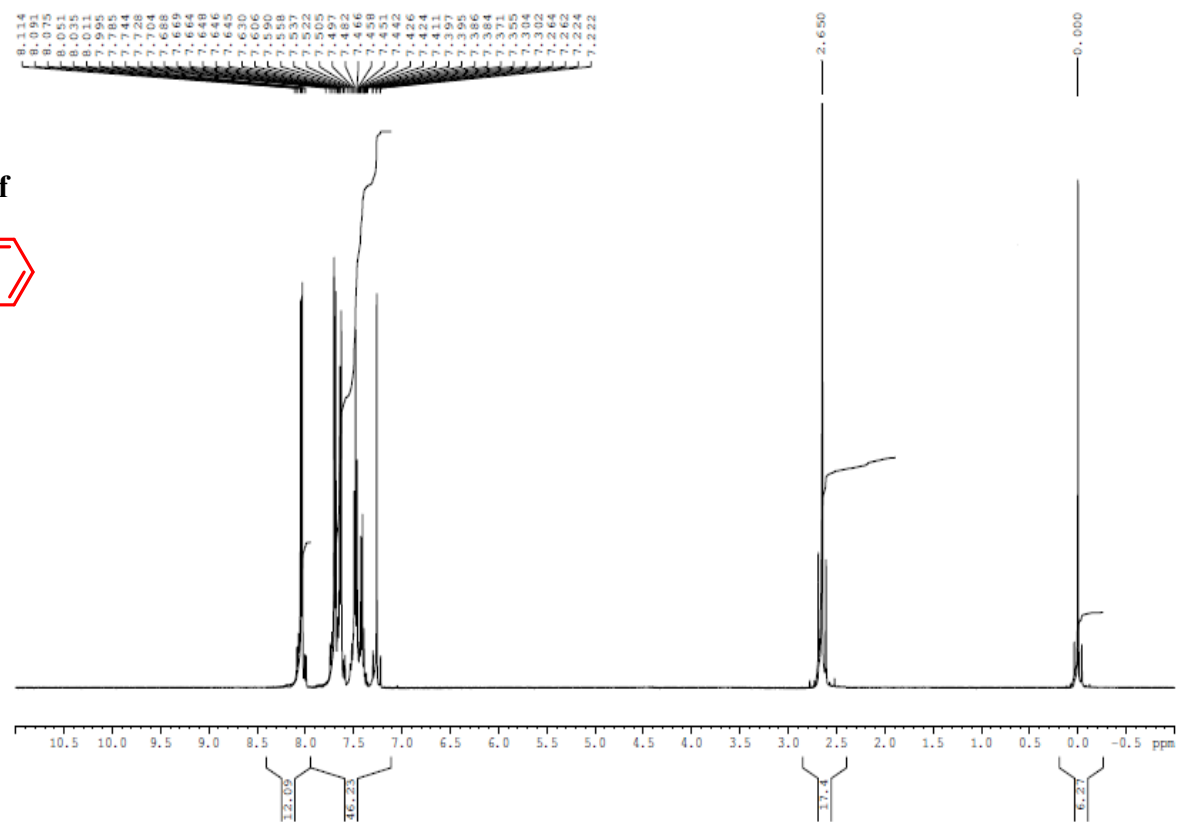

<sup>13</sup>C NMR spectra of

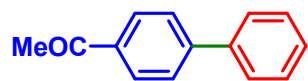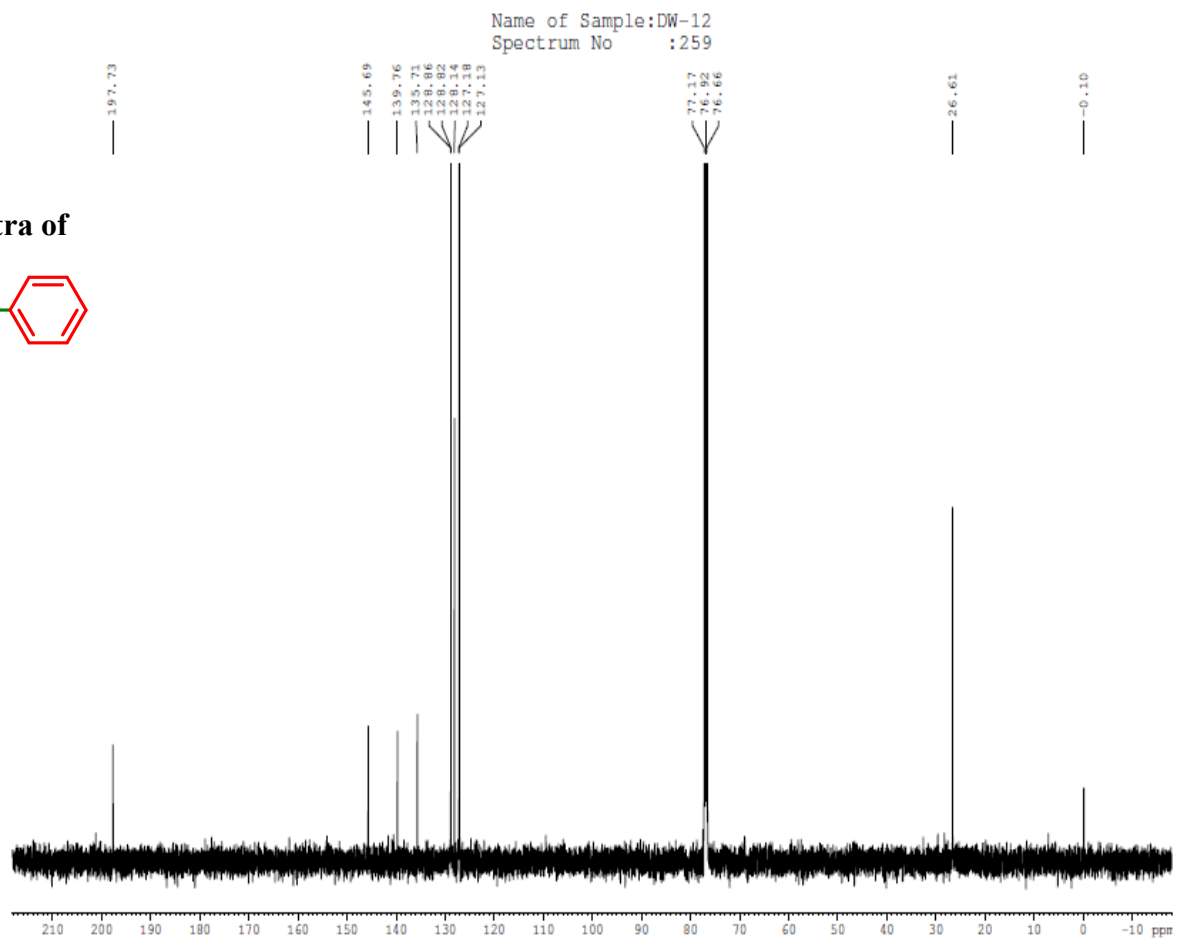



<sup>13</sup>C NMR spectra of

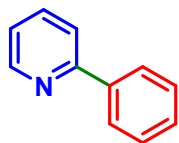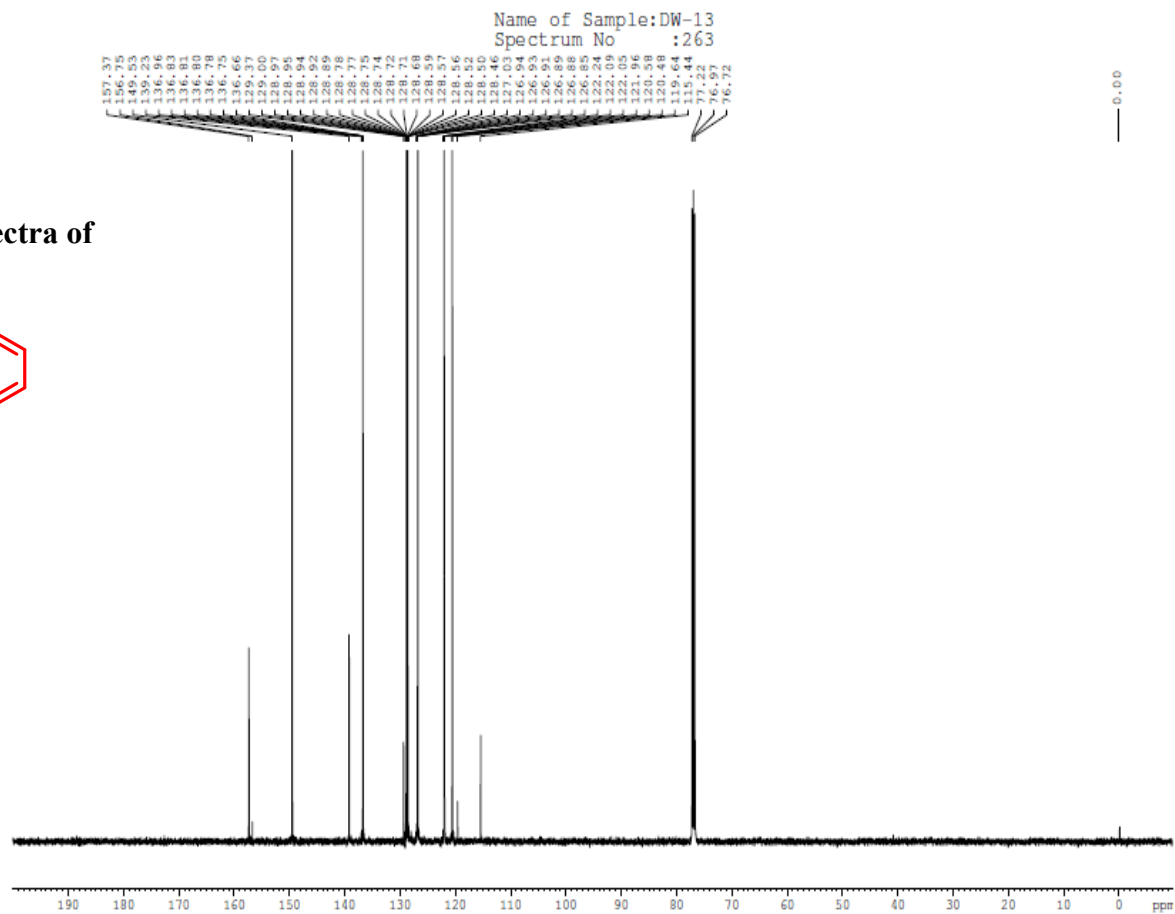



<sup>1</sup>H NMR spectra of

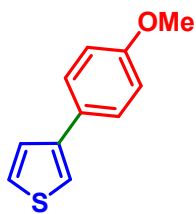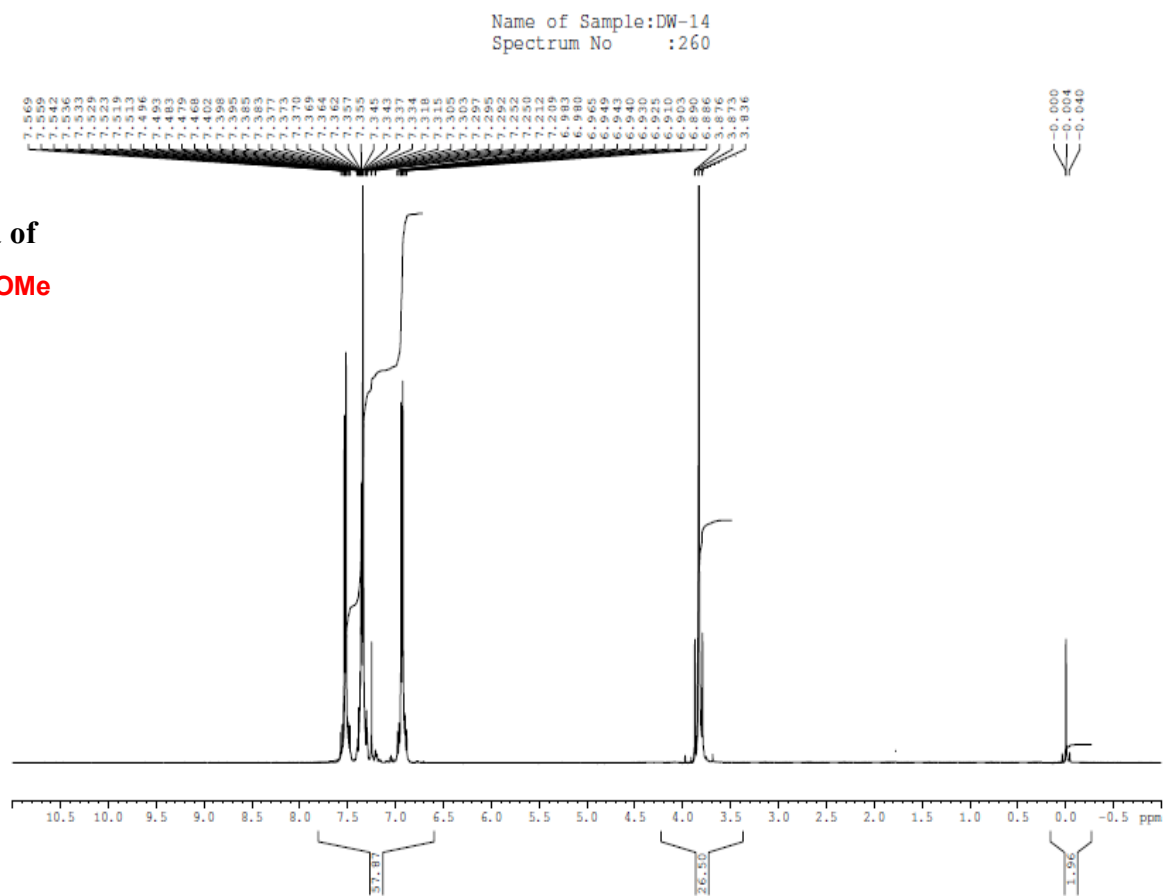

**<sup>13</sup>C NMR spectra of**

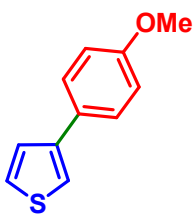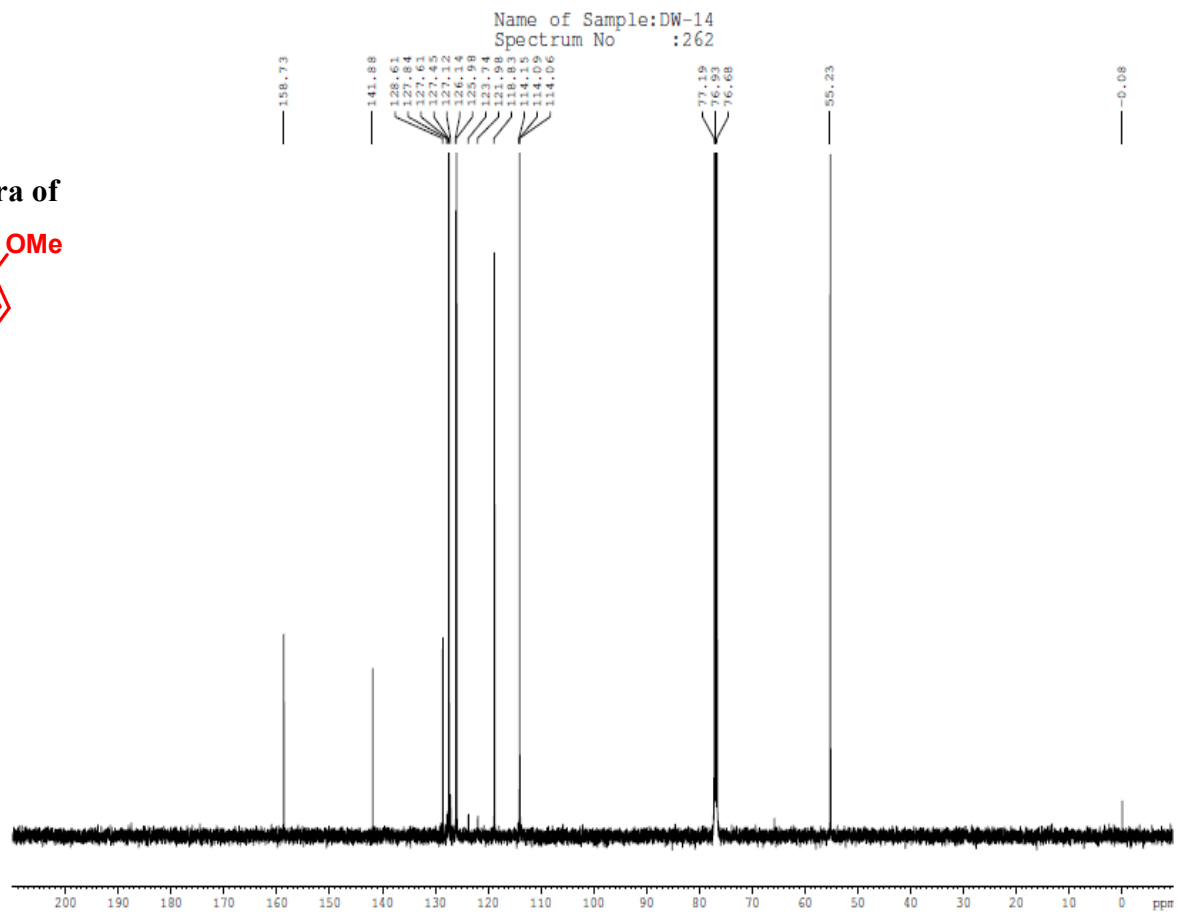

Name of Sample: DW-15  
Spectrum No : 269

<sup>1</sup>H NMR spectra of

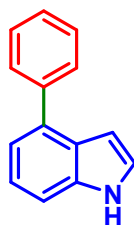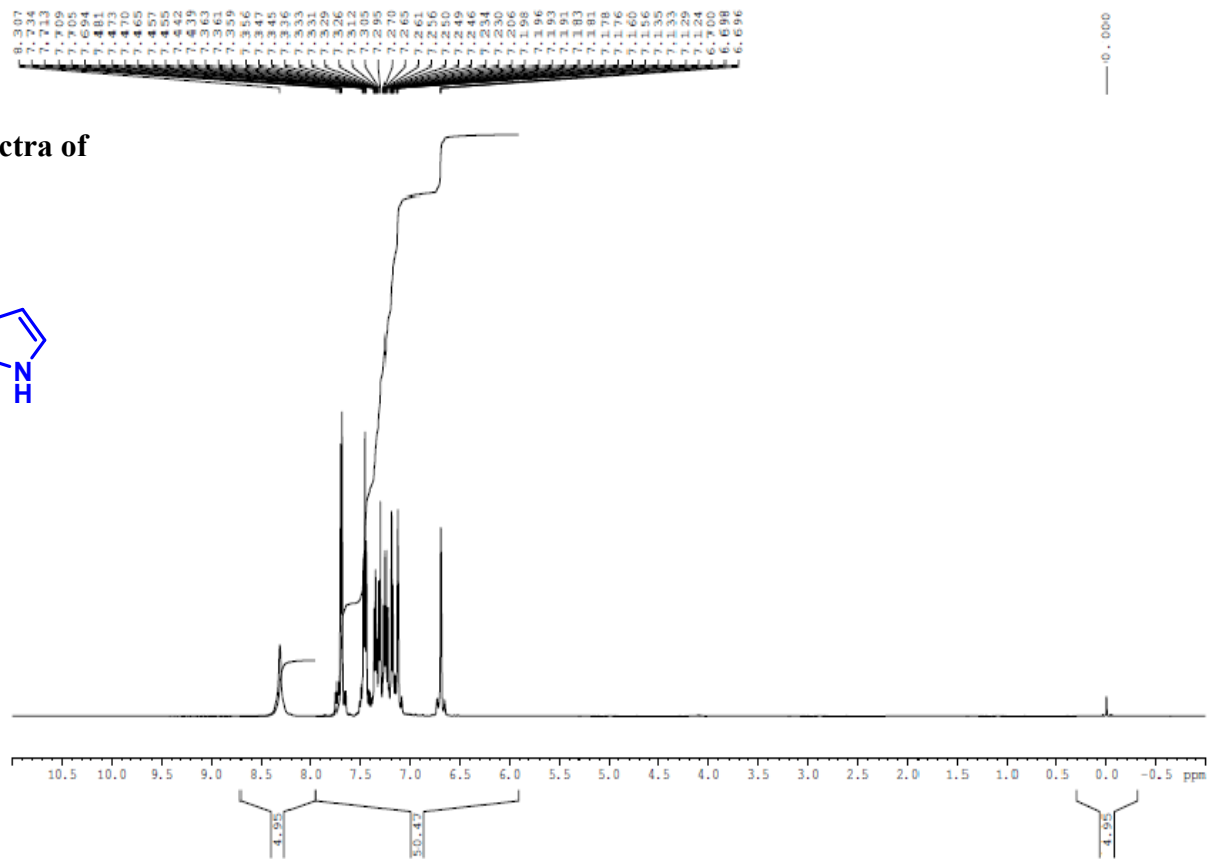

Name of Sample:DW-15  
Spectrum No :270

<sup>13</sup>C NMR spectra of

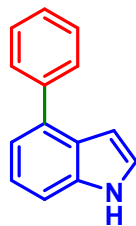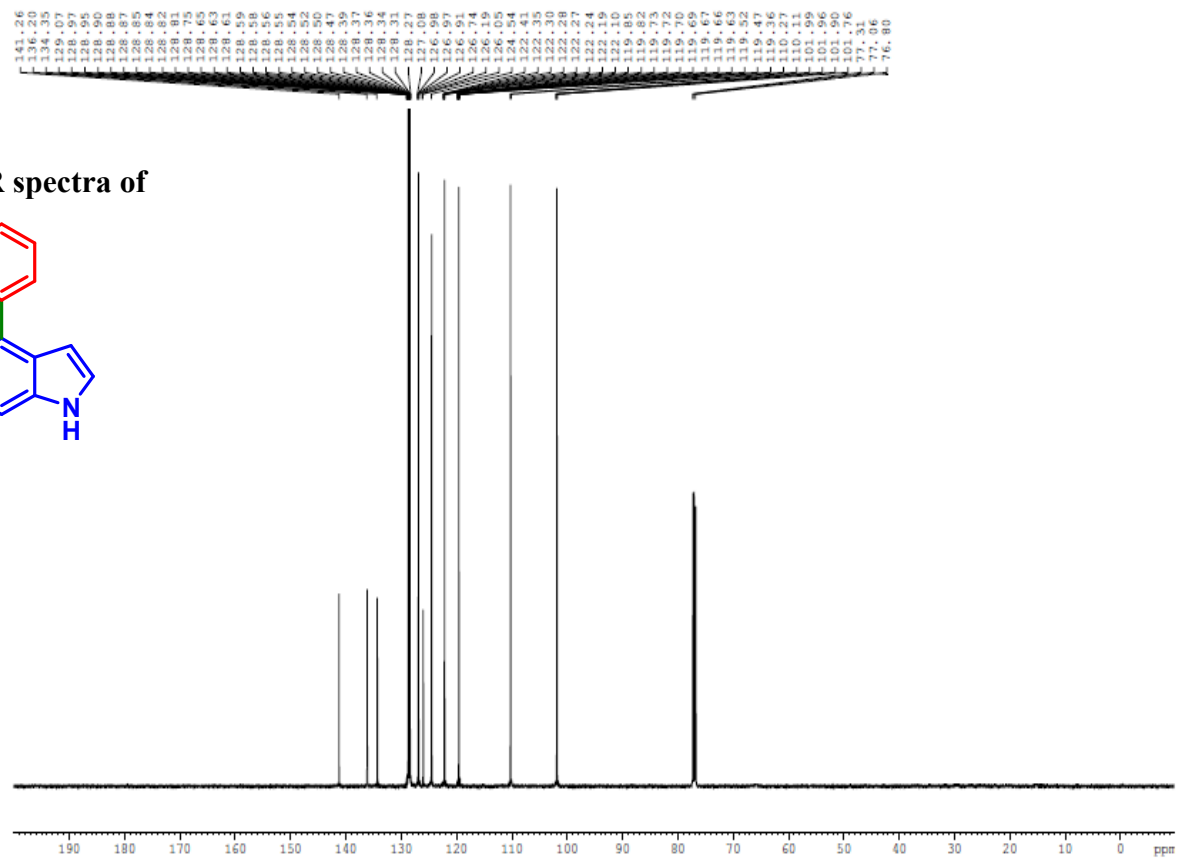

Supplement: c5nj00288e1.pdf [file c5nj00288e1.pdf]
